# Supplementary material for: One Health Approach on Dog Bites: Demographic and Associated Socioeconomic Factors in Southern Brazil
Source: MDPI journal article supplement (doi:10.3390/tropicalmed8040189), 2023-03-25
Supplement: s1 [file s1]

Table S2: Data of human density by neighborhood of Curitiba, Southern Brazil, 2010.

| Neighborhood number | Neighborhood code | Neighborhood name   | Population density per km <sup>2</sup> | Human density (popul./km <sup>2</sup> ) |
|---------------------|-------------------|---------------------|----------------------------------------|-----------------------------------------|
| 1                   | 4106902050        | Abranches           | 30.56                                  | 0.31                                    |
| 2                   | 4106902009        | Agua Verde          | 107.74                                 | 1.08                                    |
| 3                   | 4106902014        | Ahu                 | 62.03                                  | 0.62                                    |
| 4                   | 4106902064        | Alto Boqueirao      | 44.77                                  | 0.45                                    |
| 5                   | 4106902004        | Alto da Gloria      | 63.37                                  | 0.63                                    |
| 6                   | 4106902005        | Alto da XV          | 57.43                                  | 0.57                                    |
| 7                   | 4106902055        | Atuba               | 38.31                                  | 0.38                                    |
| 8                   | 4106902068        | Augusta             | 7.19                                   | 0.07                                    |
| 9                   | 4106902035        | Bacacheri           | 33.67                                  | 0.34                                    |
| 10                  | 4106902036        | Bairro Alto         | 64.03                                  | 0.64                                    |
| 11                  | 4106902052        | Barreirinha         | 49.76                                  | 0.5                                     |
| 12                  | 4106902010        | Batel               | 62.6                                   | 0.63                                    |
| 13                  | 4106902011        | Bigorrilho          | 97.83                                  | 0.98                                    |
| 14                  | 4106902034        | Boa Vista           | 59.44                                  | 0.59                                    |
| 15                  | 4106902013        | Bom Retiro          | 27.16                                  | 0.27                                    |
| 16                  | 4106902056        | Boqueirao           | 49.63                                  | 0.5                                     |
| 17                  | 4106902061        | Butiatuvinha        | 12.33                                  | 0.12                                    |
| 18                  | 4106902016        | Cabral              | 64.44                                  | 0.64                                    |
| 19                  | 4106902051        | Cachoeira           | 28.91                                  | 0.29                                    |
| 20                  | 4106902021        | Cajuru              | 81.57                                  | 0.82                                    |
| 21                  | 4106902030        | Campina do Siqueira | 43.16                                  | 0.43                                    |
| 22                  | 4106902044        | Campo Comprido      | 33.62                                  | 0.34                                    |
| 23                  | 4106902071        | Campo do Santana    | 12.35                                  | 0.12                                    |
| 24                  | 4106902020        | Capao da Imbuia     | 110.99                                 | 1.11                                    |
| 25                  | 4106902058        | Capao Raso          | 40.54                                  | 0.41                                    |
| 26                  | 4106902047        | Cascatinha          | 9.9                                    | 0.1                                     |
| 27                  | 4106902070        | Caximba             | 3.07                                   | 0.03                                    |
| 28                  | 4106902001        | Centro              | 113.56                                 | 1.14                                    |
| 29                  | 4106902003        | Centro C vico       | 50.5                                   | 0.51                                    |

|    |            |                     |       |      |
|----|------------|---------------------|-------|------|
| 30 | 4106902075 | CIC                 | 40.3  | 0.4  |
| 31 | 4106902006 | Cristo Rei          | 95.34 | 0.95 |
| 32 | 4106902039 | Fanny               | 41.69 | 0.42 |
| 33 | 4106902042 | Fazendinha          | 75.39 | 0.75 |
| 34 | 4106902072 | Ganchinho           | 9.84  | 0.1  |
| 35 | 4106902023 | Guabirota           | 43.18 | 0.43 |
| 36 | 4106902026 | Gua ra              | 64.48 | 0.64 |
| 37 | 4106902038 | Hauer               | 33.37 | 0.33 |
| 38 | 4106902017 | Hugo Lange          | 28.64 | 0.29 |
| 39 | 4106902007 | Jardim Bot nico     | 22.39 | 0.22 |
| 40 | 4106902022 | Jardim das Americas | 39.68 | 0.4  |
| 41 | 4106902018 | Jardim Social       | 29.09 | 0.29 |
| 42 | 4106902015 | Juveve              | 94.0  | 0.94 |
| 43 | 4106902062 | Lamenha Pequena     | 3.14  | 0.03 |
| 44 | 4106902040 | Lindoia             | 72.64 | 0.73 |
| 45 | 4106902012 | Merces              | 35.92 | 0.36 |
| 46 | 4106902045 | Mossungue           | 28.72 | 0.29 |
| 47 | 4106902041 | Novo Mundo          | 74.07 | 0.74 |
| 48 | 4106902059 | Orleans             | 15.82 | 0.16 |
| 49 | 4106902025 | Parolin             | 51.16 | 0.51 |
| 50 | 4106902032 | Pilarzinho          | 40.09 | 0.4  |
| 51 | 4106902066 | Pinheirinho         | 47.94 | 0.48 |
| 52 | 4106902027 | Portao              | 72.82 | 0.73 |
| 53 | 4106902024 | Prado Velho         | 24.97 | 0.25 |
| 54 | 4106902008 | Reboucas            | 50.19 | 0.5  |
| 55 | 4106902069 | Riviera             | 1.19  | 0.01 |
| 56 | 4106902053 | Santa Candida       | 32.19 | 0.32 |
| 57 | 4106902063 | Santa Felicidade    | 25.93 | 0.26 |
| 58 | 4106902043 | Santa Quiteria      | 57.39 | 0.57 |
| 59 | 4106902046 | Santo Inacio        | 19.34 | 0.19 |
| 60 | 4106902060 | Sao Braz            | 46.56 | 0.47 |
| 61 | 4106902002 | Sao Francisco       | 45.26 | 0.45 |

|    |            |               |        |      |
|----|------------|---------------|--------|------|
| 62 | 4106902048 | Sao Joao      | 10.72  | 0.11 |
| 63 | 4106902033 | Sao Lourenco  | 27.59  | 0.28 |
| 64 | 4106902067 | Sao Miguel    | 6.33   | 0.06 |
| 65 | 4106902029 | Seminario     | 32.26  | 0.32 |
| 66 | 4106902065 | Sõtio Cercado | 103.15 | 1.03 |
| 67 | 4106902049 | Taboao        | 18.58  | 0.19 |
| 68 | 4106902019 | Taruma        | 19.36  | 0.19 |
| 69 | 4106902074 | Tatuquara     | 46.98  | 0.47 |
| 70 | 4106902054 | Tingui        | 57.26  | 0.57 |
| 71 | 4106902037 | Uberaba       | 50.71  | 0.51 |
| 72 | 4106902073 | Umbara        | 8.34   | 0.08 |
| 73 | 4106902028 | Vila Izabel   | 95.43  | 0.95 |
| 74 | 4106902031 | Vista Alegre  | 30.28  | 0.3  |
| 75 | 4106902057 | Xaxim         | 62.94  | 0.63 |

---
