# Supplementary material for: One Health Approach on Dog Bites: Demographic and Associated Socioeconomic Factors in Southern Brazil
Source: MDPI journal article supplement (doi:10.3390/tropicalmed8040189), 2023-03-25
Supplement: s1 [file s1]

[Expandir menu](#) | [Reduzir menu](#)

- Início
- Informação e ajuda
- Idioma/Opções/Configurações
- Calculadora
- Cálculos
  - Taxa de Mort.Pad.
  - Proporção
  - Tabela 2 x 2
  - Dose-Resposta
  - Tabela L x C
  - Casos-Controlle pareados
  - Triagem
- Pessoas-Tempo
  - 1 taxa
  - Comparar 2 taxas
- Variáveis contínuas
  - Média IC
  - Mediana/%il IC
  - Teste t
  - ANOVA
- Tamanho da amostra
- Poder
  - Números aleatórios
- Buscas
  - Google--Internet
  - PubMed--MEDLARS
- Links na Internet
- Baixar OpenEpi
- Desenvolvimento

[Início](#)

[Entrar dados](#)

[Resultados](#)

[Análise de tabela simples](#)

[Exemplos](#)

[Ajuda](#)

|       |      |       |      |      |
|-------|------|-------|------|------|
| Var 2 | 85   | 356   | 0    | 441  |
| Var 1 | 1131 | 3360  | 6    | 4497 |
|       | 1346 | 3876  | 9    | 5231 |
|       | 930  | 3045  | 6    | 3981 |
|       | 689  | 2405  | 4    | 3098 |
|       | 674  | 2439  | 5    | 3118 |
|       | 644  | 2377  | 6    | 3027 |
|       | 546  | 2454  | 7    | 3007 |
|       | 512  | 2226  | 6    | 2744 |
|       | 505  | 2240  | 2    | 2747 |
|       | 474  | 2400  | 1    | 2875 |
|       | 471  | 2201  | 1    | 2673 |
|       | 418  | 1944  | 3    | 2365 |
|       | 296  | 1572  | 2    | 1870 |
|       | 206  | 1216  | 1    | 1423 |
|       | 169  | 862   | 2    | 1033 |
|       | 102  | 602   | 0    | 704  |
|       | 50   | 326   | 1    | 377  |
|       | 15   | 127   | 0    | 142  |
|       | 6    | 33    | 0    | 39   |
|       | 9269 | 36061 | 6245 | 392  |

## Qui-quadrado para Tabela L x C

---

|                    |            |
|--------------------|------------|
| Qui-quadrado       | 373.5      |
| Graus de liberdade | 38         |
| Valor-p            | <0.0000001 |

Cochran recomenda aceitar o qui-quadrado se:

1. Menos de 20% das células tenham valor esperado  $< 5$ .
2. Nenhuma célula tem um valor esperado  $< 1$ .

Nesta tabela:

28% of 60 cells have expected values  $< 5$ .

5 cells have expected values  $< 1$ .

Esta tabela NÃO CUMPRE os critérios de Cochran.

Valor esperado = total de linhas \* total de colunas / total

Rosner, B. Fundamentos de Bioestatística. 5a ed. Duxbury Thompson Learning 2000; p. 395

Resultados do OpenEpi, Versão 3, calculadora de código aberto--RbyC

Imprima a partir do navegador com ctrl-P

ou selecione o texto para copiar e colar em outros programas.

**Parece que não há nenhum exemplo para este exercício.**
