# Supplementary material for: One Health Approach on Dog Bites: Demographic and Associated Socioeconomic Factors in Southern Brazil
Source: MDPI journal article supplement (doi:10.3390/tropicalmed8040189), 2023-03-25
Supplement: s1 [file s1]

Table S3: Data of the median income by neighborhood of Curitiba, Southern Brazil, 2010.

| Neighborhood number | Neighborhood code | Neighborhood name   | Median income of neighborhood (USD,2012) |
|---------------------|-------------------|---------------------|------------------------------------------|
| 1                   | 4106902050        | ABRANCHES           | 917.81                                   |
| 2                   | 4106902009        | ÁGUA VERDE          | 2283.11                                  |
| 3                   | 4106902014        | AHÚ                 | 2374.43                                  |
| 4                   | 4106902064        | ALTO BOQUEIRÃO      | 913.24                                   |
| 5                   | 4106902004        | ALTO DA GLÓRIA      | 2374.43                                  |
| 6                   | 4106902005        | ALTO DA RUA XV      | 2283.11                                  |
| 7                   | 4106902055        | ATUBA               | 1091.32                                  |
| 8                   | 4106902068        | AUGUSTA             | 686.07                                   |
| 9                   | 4106902035        | BACACHERI           | 1917.81                                  |
| 10                  | 4106902036        | BAIRRO ALTO         | 1004.57                                  |
| 11                  | 4106902052        | BARREIRINHA         | 1050.23                                  |
| 12                  | 4106902010        | BATEL               | 3196.35                                  |
| 13                  | 4106902011        | BIGORRILHO          | 2700.91                                  |
| 14                  | 4106902034        | BOA VISTA           | 1369.86                                  |
| 15                  | 4106902013        | BOM RETIRO          | 2652.97                                  |
| 16                  | 4106902056        | BOQUEIRÃO           | 1004.57                                  |
| 17                  | 4106902061        | BUTIATUVINHA        | 913.24                                   |
| 18                  | 4106902016        | CABRAL              | 2652.97                                  |
| 19                  | 4106902051        | CACHOEIRA           | 753.42                                   |
| 20                  | 4106902021        | CAJURU              | 805.71                                   |
| 21                  | 4106902030        | CAMPINA DO SIQUEIRA | 1826.48                                  |
| 22                  | 4106902044        | CAMPO COMPRIDO      | 1150.68                                  |
| 23                  | 4106902071        | CAMPO DE SANTANA    | 684.93                                   |
| 24                  | 4106902020        | CAPÃO DA IMBUIA     | 1141.55                                  |
| 25                  | 4106902058        | CAPÃO RASO          | 981.74                                   |
| 26                  | 4106902047        | CASCATINHA          | 1826.48                                  |
| 27                  | 4106902070        | CAXIMBA             | 577.63                                   |
| 28                  | 4106902001        | CENTRO              | 1369.86                                  |
| 29                  | 4106902003        | CENTRO CÍVICO       | 2283.11                                  |

|    |            |                               |         |
|----|------------|-------------------------------|---------|
| 30 | 4106902075 | CIDADE INDUSTRIAL DE CURITIBA | 796.8   |
| 31 | 4106902006 | CRISTO REI                    | 2271.69 |
| 32 | 4106902039 | FANNY                         | 1187.21 |
| 33 | 4106902042 | FAZENDINHA                    | 917.81  |
| 34 | 4106902072 | GANCHINHO                     | 643.84  |
| 35 | 4106902023 | GUABIROTUBA                   | 1598.17 |
| 36 | 4106902026 | GUAÍRA                        | 1054.79 |
| 37 | 4106902038 | HAUER                         | 1150.68 |
| 38 | 4106902017 | HUGO LANGE                    | 2735.16 |
| 39 | 4106902007 | JARDIM BOTÂNICO               | 1506.85 |
| 40 | 4106902022 | JARDIM DAS AMÉRICAS           | 2283.11 |
| 41 | 4106902018 | JARDIM SOCIAL                 | 3264.84 |
| 42 | 4106902015 | JUVEVÊ                        | 2511.42 |
| 43 | 4106902062 | LAMENHA PEQUENA               | 732.88  |
| 44 | 4106902040 | LINDÓIA                       | 913.24  |
| 45 | 4106902012 | MERCÊS                        | 1826.48 |
| 46 | 4106902045 | MOSSUNGUÊ                     | 2739.73 |
| 47 | 4106902041 | NOVO MUNDO                    | 1141.55 |
| 48 | 4106902059 | ORLEANS                       | 1141.55 |
| 49 | 4106902025 | PAROLIN                       | 913.24  |
| 50 | 4106902032 | PILARZINHO                    | 1004.57 |
| 51 | 4106902066 | PINHEIRINHO                   | 831.05  |
| 52 | 4106902027 | PORTÃO                        | 1648.4  |
| 53 | 4106902024 | PRADO VELHO                   | 558.22  |
| 54 | 4106902008 | REBOUÇAS                      | 1552.51 |
| 55 | 4106902069 | RIVIERA                       | 684.93  |
| 56 | 4106902053 | SANTA CÂNDIDA                 | 913.24  |
| 57 | 4106902063 | SANTA FELICIDADE              | 1324.2  |
| 58 | 4106902043 | SANTA QUITÉRIA                | 1187.21 |
| 59 | 4106902046 | SANTO INÁCIO                  | 1369.86 |
| 60 | 4106902060 | SÃO BRAZ                      | 1095.89 |
| 61 | 4106902002 | SÃO FRANCISCO                 | 1598.17 |

|    |            |               |         |
|----|------------|---------------|---------|
| 62 | 4106902048 | SÃO JOÃO      | 1004.57 |
| 63 | 4106902033 | SÃO LOURENÇO  | 2146.12 |
| 64 | 4106902067 | SÃO MIGUEL    | 639.27  |
| 65 | 4106902029 | SEMINÁRIO     | 2330.59 |
| 66 | 4106902065 | SÍTIO CERCADO | 776.26  |
| 67 | 4106902049 | TABOÃO        | 1089.04 |
| 68 | 4106902019 | TARUMÃ        | 1917.81 |
| 69 | 4106902074 | TATUQUARA     | 639.27  |
| 70 | 4106902054 | TINGUI        | 1232.88 |
| 71 | 4106902037 | UBERABA       | 913.24  |
| 72 | 4106902073 | UMBARÁ        | 776.26  |
| 73 | 4106902028 | VILA IZABEL   | 2009.13 |
| 74 | 4106902031 | VISTA ALEGRE  | 1509.13 |
| 75 | 4106902057 | XAXIM         | 958.9   |

---
