# Supplementary material for: One Health Approach on Dog Bites: Demographic and Associated Socioeconomic Factors in Southern Brazil
Source: MDPI journal article supplement (doi:10.3390/tropicalmed8040189), 2023-03-25
Supplement: s1 [file s1]

```
. nbreg n_mordeduras rendamediadolares_cem, dispersion(mean) exposure(num_habitantes) irr
```

Fitting Poisson model:

```
Iteration 0:  log likelihood = -1501.905
Iteration 1:  log likelihood = -1501.7905
Iteration 2:  log likelihood = -1501.7905
```

Fitting constant-only model:

```
Iteration 0:  log likelihood = -508.82329
Iteration 1:  log likelihood = -503.05528
Iteration 2:  log likelihood = -489.13435
Iteration 3:  log likelihood = -488.93696
Iteration 4:  log likelihood = -488.93622
Iteration 5:  log likelihood = -488.93622
```

Fitting full model:

```
Iteration 0:  log likelihood = -473.22552
Iteration 1:  log likelihood = -469.19211
Iteration 2:  log likelihood = -467.63033
Iteration 3:  log likelihood = -467.62291
Iteration 4:  log likelihood = -467.62291
```

|                              |               |   |        |
|------------------------------|---------------|---|--------|
| Negative binomial regression | Number of obs | = | 75     |
|                              | LR chi2(1)    | = | 42.63  |
| Dispersion = mean            | Prob > chi2   | = | 0.0000 |
| Log likelihood = -467.62291  | Pseudo R2     | = | 0.0436 |

| n_mordeduras          | IRR      | Std. Err.  | z      | P> z  | [95% Conf. Interval] |           |
|-----------------------|----------|------------|--------|-------|----------------------|-----------|
| rendamediadolares_cem | .9505122 | .0060369   | -7.99  | 0.000 | .9387534             | .9624183  |
| _cons                 | .047888  | .0053081   | -27.42 | 0.000 | .0385367             | .0595083  |
| ln(num_habitantes)    | 1        | (exposure) |        |       |                      |           |
| /lnalpha              | -1.77875 | .1803606   |        |       | -2.13225             | -1.425249 |
| alpha                 | .1688491 | .0304537   |        |       | .1185702             | .2404485  |

Note: Estimates are transformed only in the first equation.

Note: \_cons estimates baseline incidence rate.

LR test of alpha=0: chibar2(01) = 2068.34 Prob >= chibar2 = 0.000
