# Supplementary material for: One Health Approach on Dog Bites: Demographic and Associated Socioeconomic Factors in Southern Brazil
Source: MDPI journal article supplement (doi:10.3390/tropicalmed8040189), 2023-03-25
Supplement: s1 [file s1]

Table S1: Data of annual dog bites incidence by neighborhood of Curitiba, Southern Brazil, between January 1st 2010 and December 31st 2015.

| Neighborhood<br>number | Neighborhood<br>code | Neighborhood<br>name   | Cumulative incidence/1,000<br>pop. | Average annual incidence/1,000<br>pop. |
|------------------------|----------------------|------------------------|------------------------------------|----------------------------------------|
| 1                      | 4106902050           | Abranches              | 30.93                              | 5.16                                   |
| 2                      | 4106902009           | Agua Verde             | 7.99                               | 1.33                                   |
| 3                      | 4106902014           | Ahu                    | 13.73                              | 2.29                                   |
| 4                      | 4106902064           | Alto Boqueirao         | 26.72                              | 4.45                                   |
| 5                      | 4106902004           | Alto da Gloria         | 12.8                               | 2.13                                   |
| 6                      | 4106902005           | Alto da XV             | 9.85                               | 1.64                                   |
| 7                      | 4106902055           | Atuba                  | 20.9                               | 3.48                                   |
| 8                      | 4106902068           | Augusta                | 6.67                               | 1.11                                   |
| 9                      | 4106902035           | Bacacheri              | 17.99                              | 3                                      |
| 10                     | 4106902036           | Bairro Alto            | 29.93                              | 4.99                                   |
| 11                     | 4106902052           | Barreirinha            | 34.3                               | 5.72                                   |
| 12                     | 4106902010           | Batel                  | 6.8                                | 1.13                                   |
| 13                     | 4106902011           | Bigorrilho             | 6.71                               | 1.12                                   |
| 14                     | 4106902034           | Boa Vista              | 27.34                              | 4.56                                   |
| 15                     | 4106902013           | Bom Retiro             | 17.65                              | 2.94                                   |
| 16                     | 4106902056           | Boqueirao              | 30.32                              | 5.05                                   |
| 17                     | 4106902061           | Butiatuvinha           | 18.41                              | 3.07                                   |
| 18                     | 4106902016           | Cabral                 | 13.02                              | 2.17                                   |
| 19                     | 4106902051           | Cachoeira              | 18.9                               | 3.15                                   |
| 20                     | 4106902021           | Cajuru                 | 37.7                               | 6.28                                   |
| 21                     | 4106902030           | Campina do<br>Siqueira | 20.61                              | 3.44                                   |
| 22                     | 4106902044           | Campo Comprido         | 19.78                              | 3.3                                    |
| 23                     | 4106902071           | Campo do Santana       | 37.96                              | 6.33                                   |
| 24                     | 4106902020           | Capao da Imbuia        | 28.87                              | 4.81                                   |
| 25                     | 4106902058           | Capao Raso             | 24.76                              | 4.13                                   |
| 26                     | 4106902047           | Cascatinha             | 13.42                              | 2.24                                   |
| 27                     | 4106902070           | Caximba                | 42.43                              | 7.07                                   |

|    |            |                     |        |       |
|----|------------|---------------------|--------|-------|
| 28 | 4106902001 | Centro              | 12.79  | 2.13  |
| 29 | 4106902003 | Centro Cívico       | 10.45  | 1.74  |
| 30 | 4106902075 | CIC                 | 28.06  | 4.68  |
| 31 | 4106902006 | Cristo Rei          | 8.41   | 1.4   |
| 32 | 4106902039 | Fanny               | 29.83  | 4.97  |
| 33 | 4106902042 | Fazendinha          | 27.18  | 4.53  |
| 34 | 4106902072 | Ganchinho           | 18.34  | 3.06  |
| 35 | 4106902023 | Guabirotuba         | 21.73  | 3.62  |
| 36 | 4106902026 | Guaíra              | 27.84  | 4.64  |
| 37 | 4106902038 | Hauer               | 36.12  | 6.02  |
| 38 | 4106902017 | Hugo Lange          | 7.96   | 1.33  |
| 39 | 4106902007 | Jardim Botânico     | 18.15  | 3.02  |
| 40 | 4106902022 | Jardim das Americas | 15.67  | 2.61  |
| 41 | 4106902018 | Jardim Social       | 13.34  | 2.22  |
| 42 | 4106902015 | Juveve              | 8.38   | 1.4   |
| 43 | 4106902062 | Lamenha Pequena     | 18.94  | 3.16  |
| 44 | 4106902040 | Lindoia             | 28.54  | 4.76  |
| 45 | 4106902012 | Merces              | 13.79  | 2.3   |
| 46 | 4106902045 | Mossungue           | 13.66  | 2.28  |
| 47 | 4106902041 | Novo Mundo          | 28.48  | 4.75  |
| 48 | 4106902059 | Orleans             | 24.06  | 4.01  |
| 49 | 4106902025 | Parolin             | 44.66  | 7.44  |
| 50 | 4106902032 | Pilarzinho          | 31.67  | 5.28  |
| 51 | 4106902066 | Pinheirinho         | 29.74  | 4.96  |
| 52 | 4106902027 | Portao              | 18.47  | 3.08  |
| 53 | 4106902024 | Prado Velho         | 61.05  | 10.17 |
| 54 | 4106902008 | Reboucas            | 20.75  | 3.46  |
| 55 | 4106902069 | Riviera             | 110.73 | 18.45 |
| 56 | 4106902053 | Santa Candida       | 37.09  | 6.18  |
| 57 | 4106902063 | Santa Felicidade    | 27.24  | 4.54  |
| 58 | 4106902043 | Santa Quiteria      | 34.7   | 5.78  |
| 59 | 4106902046 | Santo Inacio        | 22.33  | 3.72  |

|    |            |               |       |      |
|----|------------|---------------|-------|------|
| 60 | 4106902060 | Sao Braz      | 28.14 | 4.69 |
| 61 | 4106902002 | Sao Francisco | 12.07 | 2.01 |
| 62 | 4106902048 | Sao Joao      | 15.99 | 2.66 |
| 63 | 4106902033 | Sao Lourenco  | 19.12 | 3.19 |
| 64 | 4106902067 | Sao Miguel    | 0.21  | 0.03 |
| 65 | 4106902029 | Seminario     | 12.84 | 2.14 |
| 66 | 4106902065 | Sítio Cercado | 32.22 | 5.37 |
| 67 | 4106902049 | Taboao        | 20.91 | 3.48 |
| 68 | 4106902019 | Taruma        | 11.4  | 1.9  |
| 69 | 4106902074 | Tatuquara     | 36.43 | 6.07 |
| 70 | 4106902054 | Tingui        | 28.57 | 4.76 |
| 71 | 4106902037 | Uberaba       | 32.38 | 5.4  |
| 72 | 4106902073 | Umbara        | 15.64 | 2.61 |
| 73 | 4106902028 | Vila Izabel   | 11.8  | 1.97 |
| 74 | 4106902031 | Vista Alegre  | 28.31 | 4.72 |
| 75 | 4106902057 | Xaxim         | 22.89 | 3.82 |

---
